# Supplementary material
Source: MDPI journal article supplement (https://www.mdpi.com/2075-163X/10/12/1110)
Supplement: s1 [file s1]

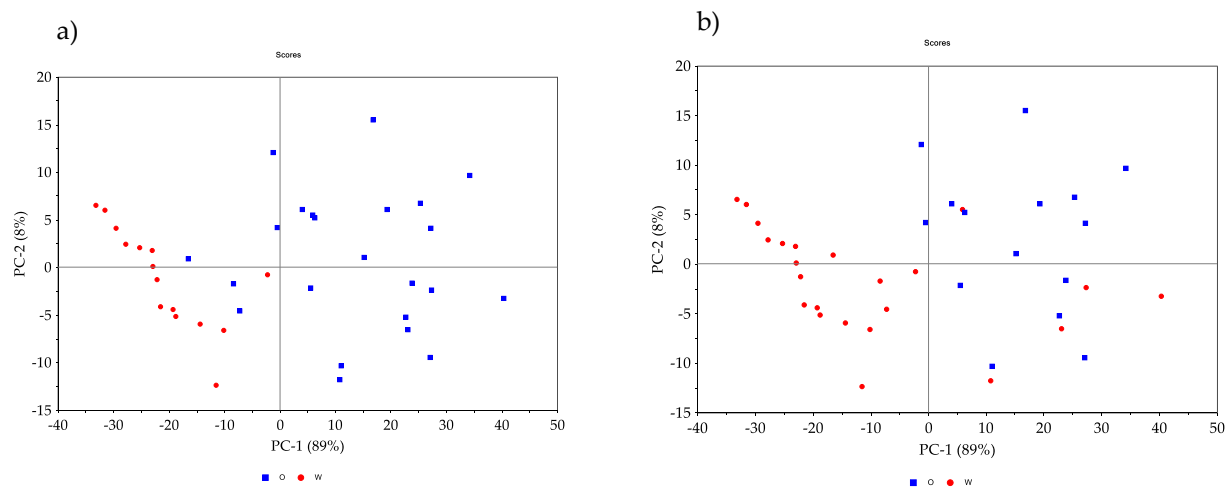

**Figure S1:** PCA models of the LWIR data at (a) 3% cut-off and (b) 7% cut-off grades.

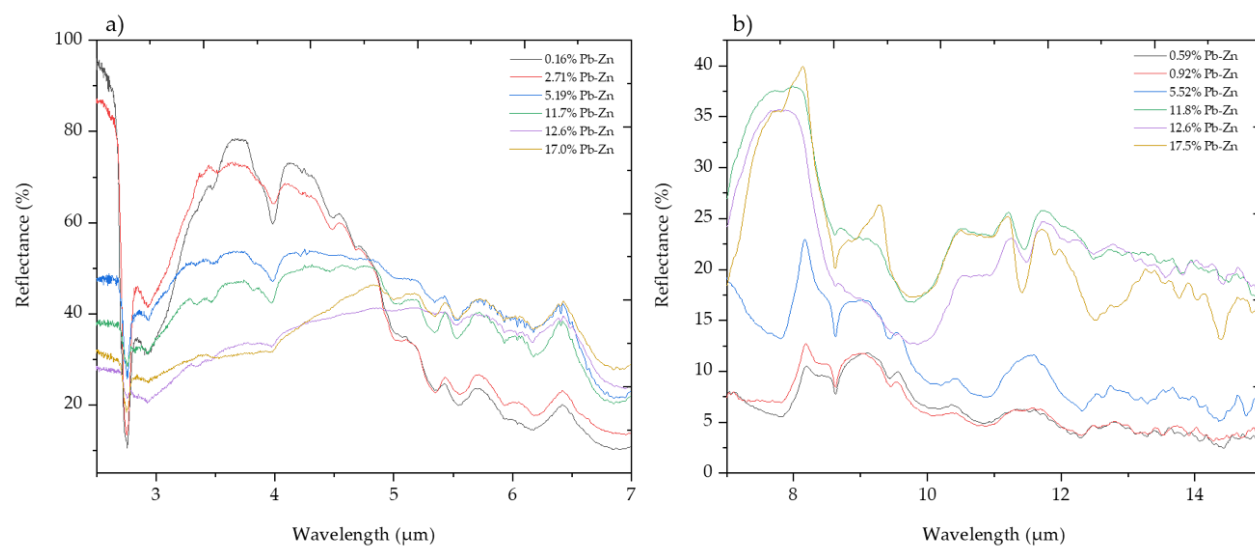

**Figure S2:** The spectra plots of some of the samples showing spectral variation based on the combined Pb-Zn concentration in the (a) MWIR; (b) LWIR regions. The plots show the spectral responses of the samples at different concentration values of the combined Pb-Zn.

**Table S1:** Confusion matrix of k-means model applied to MWIR dataset at the three cut-off grades.

|            |                                    |               |            |              |
|------------|------------------------------------|---------------|------------|--------------|
| 3% cut-off |                                    | <b>Actual</b> | <b>Ore</b> | <b>Waste</b> |
|            | <b>Predicted</b>                   |               | 1          | 2            |
|            | <b>Ore</b>                         | 1             | 22         | 1            |
|            | <b>Waste</b>                       | 2             | 1          | 14           |
|            | <b>Correct classification rate</b> |               |            | 94.7%        |

  

|            |                                    |               |            |              |
|------------|------------------------------------|---------------|------------|--------------|
| 5% cut-off |                                    | <b>Actual</b> | <b>Ore</b> | <b>Waste</b> |
|            | <b>Predicted</b>                   |               | 1          | 2            |
|            | <b>Ore</b>                         | 1             | 17         | 6            |
|            | <b>Waste</b>                       | 2             | 1          | 14           |
|            | <b>Correct classification rate</b> |               |            | 81.6%        |

  

|            |                                    |               |            |              |
|------------|------------------------------------|---------------|------------|--------------|
| 7% cut-off |                                    | <b>Actual</b> | <b>Ore</b> | <b>Waste</b> |
|            | <b>Predicted</b>                   |               | 1          | 2            |
|            | <b>Ore</b>                         | 1             | 15         | 8            |
|            | <b>Waste</b>                       | 2             | 0          | 15           |
|            | <b>Correct classification rate</b> |               |            | 79%          |

**Table S2:** Confusion matrix of k-means model applied to SWIR dataset at the three cut-off grades.

|            |                                    |               |            |              |
|------------|------------------------------------|---------------|------------|--------------|
| 3% cut-off |                                    | <b>Actual</b> | <b>Ore</b> | <b>Waste</b> |
|            | <b>Predicted</b>                   |               | 1          | 2            |
|            | <b>Ore</b>                         | 1             | 16         | 2            |
|            | <b>Waste</b>                       | 2             | 7          | 13           |
|            | <b>Correct classification rate</b> |               |            | 76%          |

  

|            |                                    |               |            |              |
|------------|------------------------------------|---------------|------------|--------------|
| 5% cut-off |                                    | <b>Actual</b> | <b>Ore</b> | <b>Waste</b> |
|            | <b>Predicted</b>                   |               | 1          | 2            |
|            | <b>Ore</b>                         | 1             | 14         | 4            |
|            | <b>Waste</b>                       | 2             | 4          | 16           |
|            | <b>Correct classification rate</b> |               |            | 79%          |

  

|            |                                    |               |            |              |
|------------|------------------------------------|---------------|------------|--------------|
| 7% cut-off |                                    | <b>Actual</b> | <b>Ore</b> | <b>Waste</b> |
|            | <b>Predicted</b>                   |               | 1          | 2            |
|            | <b>Ore</b>                         | 1             | 13         | 5            |
|            | <b>Waste</b>                       | 2             | 2          | 18           |
|            | <b>Correct classification rate</b> |               |            | 81.6%        |

**Table S3:** Confusion matrix of k-means model applied to LWIR dataset at the three cut-off grades.

|            |                                    |               |            |              |
|------------|------------------------------------|---------------|------------|--------------|
| 3% cut-off |                                    | <b>Actual</b> | <b>Ore</b> | <b>Waste</b> |
|            | <b>Predicted</b>                   |               | 1          | 2            |
|            | <b>Ore</b>                         | 1             | 20         | 0            |
|            | <b>Waste</b>                       | 2             | 3          | 15           |
|            | <b>Correct classification rate</b> |               |            | 92%          |
| 5% cut-off |                                    | <b>Actual</b> | <b>Ore</b> | <b>Waste</b> |
|            | <b>Predicted</b>                   |               | 1          | 2            |
|            | <b>Ore</b>                         | 1             | 17         | 3            |
|            | <b>Waste</b>                       | 2             | 1          | 17           |
|            | <b>Correct classification rate</b> |               |            | 89.5%        |
| 7% cut-off |                                    | <b>Actual</b> | <b>Ore</b> | <b>Waste</b> |
|            | <b>Predicted</b>                   |               | 1          | 2            |
|            | <b>Ore</b>                         | 1             | 15         | 5            |
|            | <b>Waste</b>                       | 2             | 0          | 18           |
|            | <b>Correct classification rate</b> |               |            | 87%          |

**Table S4:** Confusion matrix of k-means model applied to the fused SWIR and MWIR datasets at the three cut-off grades.

|            |                                    |               |            |              |
|------------|------------------------------------|---------------|------------|--------------|
| 3% cut-off |                                    | <b>Actual</b> | <b>Ore</b> | <b>Waste</b> |
|            | <b>Predicted</b>                   |               | 1          | 2            |
|            | <b>Ore</b>                         | 1             | 19         | 15           |
|            | <b>Waste</b>                       | 2             | 4          | 0            |
|            | <b>Correct classification rate</b> |               |            | 90%          |
| 5% cut-off |                                    | <b>Actual</b> | <b>Ore</b> | <b>Waste</b> |
|            | <b>Predicted</b>                   |               | 1          | 2            |
|            | <b>Ore</b>                         | 1             | 17         | 2            |
|            | <b>Waste</b>                       | 2             | 1          | 18           |
|            | <b>Correct classification rate</b> |               |            | 92%          |
| 7% cut-off |                                    | <b>Actual</b> | <b>Ore</b> | <b>Waste</b> |
|            | <b>Predicted</b>                   |               | 1          | 2            |
|            | <b>Ore</b>                         | 1             | 15         | 4            |
|            | <b>Waste</b>                       | 2             | 0          | 19           |
|            | <b>Correct classification rate</b> |               |            | 90%          |

**Table S5:** The calibration and validation models accuracy for the classification of the materials using SVC model and the fused VNIR and SWIR at 3%, 5% and 7% cut-off grades.

|            |              |   |          |            |
|------------|--------------|---|----------|------------|
| 3% cut-off | Accuracy     |   | Training | Validation |
|            |              |   | 1        | 2          |
|            | Accuracy (%) | 1 | 92       | 81.6       |

|            |              |   |          |            |
|------------|--------------|---|----------|------------|
| 3% cut-off | Accuracy     |   | Training | Validation |
|            |              |   | 1        | 2          |
|            | Accuracy (%) | 1 | 92       | 79         |

|            |              |   |          |            |
|------------|--------------|---|----------|------------|
| 3% cut-off | Accuracy     |   | Training | Validation |
|            |              |   | 1        | 2          |
|            | Accuracy (%) | 1 | 97       | 84         |

**Table S6:** The calibration and validation models accuracy for the classification of the materials using SVC model and the fused SWIR and MWIR at 3%, 5% and 7% cut-off grades.

|            |              |   |          |            |
|------------|--------------|---|----------|------------|
| 3% cut-off | Accuracy     |   | Training | Validation |
|            |              |   | 1        | 2          |
|            | Accuracy (%) | 1 | 100      | 95         |

|            |              |   |          |            |
|------------|--------------|---|----------|------------|
| 3% cut-off | Accuracy     |   | Training | Validation |
|            |              |   | 1        | 2          |
|            | Accuracy (%) | 1 | 100      | 90         |

|            |              |   |          |            |
|------------|--------------|---|----------|------------|
| 3% cut-off | Accuracy     |   | Training | Validation |
|            |              |   | 1        | 2          |
|            | Accuracy (%) | 1 | 97       | 87         |

**Table S7:** The calibration and validation models accuracy for the classification of the materials using SVC model and the fused MWIR and LWIR at 3%, 5% and 7% cut-off grades.

|            |              |   |          |            |
|------------|--------------|---|----------|------------|
| 3% cut-off | Accuracy     |   | Training | Validation |
|            |              |   | 1        | 2          |
|            | Accuracy (%) | 1 | 100      | 92         |

|            |              |   |          |            |
|------------|--------------|---|----------|------------|
| 3% cut-off | Accuracy     |   | Training | Validation |
|            |              |   | 1        | 2          |
|            | Accuracy (%) | 1 | 100      | 90         |

|            |              |   |          |            |
|------------|--------------|---|----------|------------|
| 3% cut-off | Accuracy     |   | Training | Validation |
|            |              |   | 1        | 2          |
|            | Accuracy (%) | 1 | 100      | 84         |
